# Supplementary material
Source: publisher figshare collection journal article supplement (https://acs.figshare.com/ndownloader/files/25205534)
Supplement: Supplementary file 1 [file 25205534]

## **Formation of large crystalline domains in semiconducting polymer with semi-fluorinated alkyl side chains and application to high-performance thin-film transistors**

*Youn-Jung Heo<sup>1,†</sup>, Hyung-Gu Jeong<sup>2,†</sup>, Jihong Kim<sup>3</sup>, Bogyu Lim<sup>4</sup>, Juhwan Kim<sup>5</sup>, Yunseul Kim<sup>1</sup>, Boseok Kang<sup>6</sup>, Jin-Mun Yun<sup>7</sup>, Kilwon Cho<sup>6</sup> and Dong-Yu Kim<sup>1,\*</sup>*

<sup>1</sup>Heeger Center for Advanced Materials, School of Materials Science and Engineering, Gwangju Institute of Science and Technology (GIST), Gwangju 61005, Republic of Korea

<sup>2</sup>Busan Institute of S&T Evaluation and Planning (BISTEP), Busan 48058, Republic of Korea

<sup>3</sup>Korea Institute of S&T Evaluation and Planning (KISTEP), Seoul 06775, Republic of Korea

<sup>4</sup>Korea Research Institute of Chemical Technology (KRICT), Ulsan 44412, Republic of Korea

<sup>5</sup>Future Technology Research Center, Corporate R&D, LG Chem Research Park, Seoul 07796, Republic of Korea

<sup>6</sup>Department of Chemical Engineering, Pohang University of Science and Technology, Pohang 37673, Korea

<sup>7</sup>Radiation Research Division for Industry and Environment, Korea Energy Research Institute (KAERI), Jeongseup 56212, Republic of Korea.

E-mail: kimdy@gist.ac.kr

<sup>†</sup> These two authors contributed equally

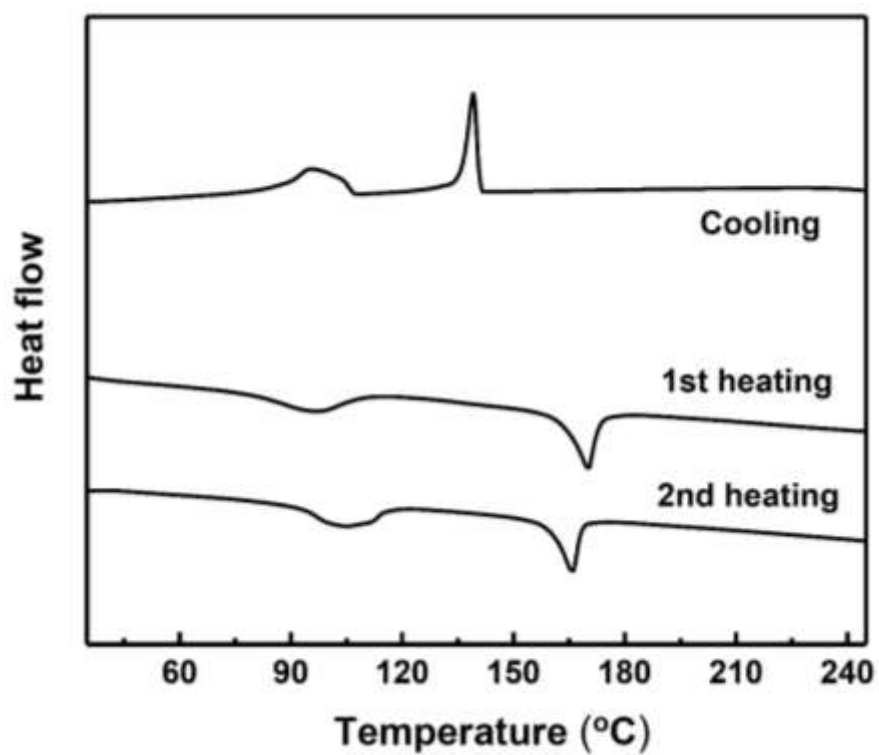

**Figure S1.** DSC curves of PC12TV12T without SFA side chains

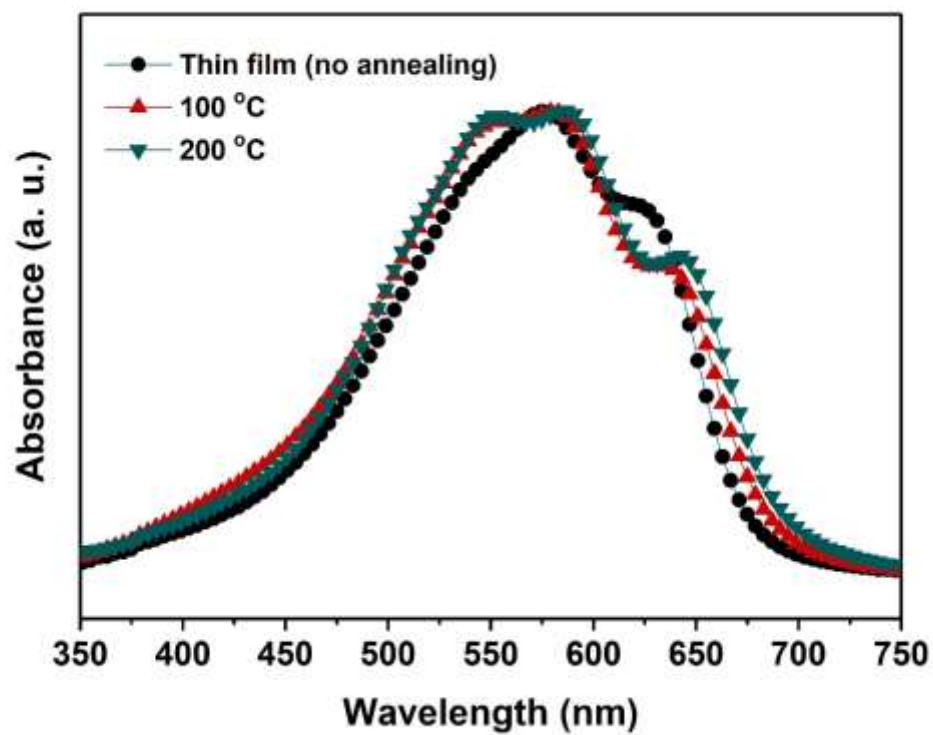

**Figure S2.** UV-Vis absorption spectra of the PC12TVC5FT thin films depending on annealing temperature.

**No annealing**

Contact angle : 109°

Surface energy : 8.21mN/m

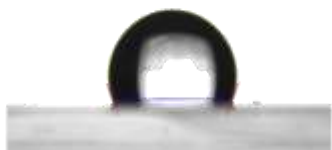

**100 °C**

Contact angle : 110°

Surface energy : 7.81mN/m

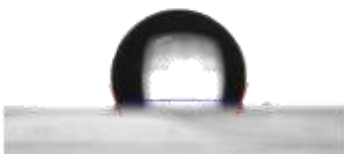

**200 °C**

Contact angle : 112°

Surface energy : 7.05mN/m

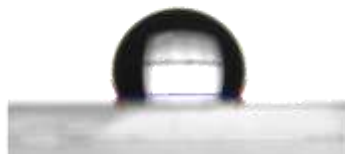

**Figure S3.** Change of contact angle depending on the annealing temperature of PC12TVC5F7T thin films.

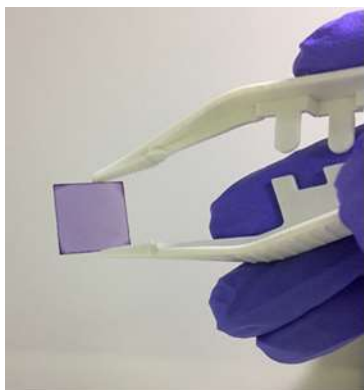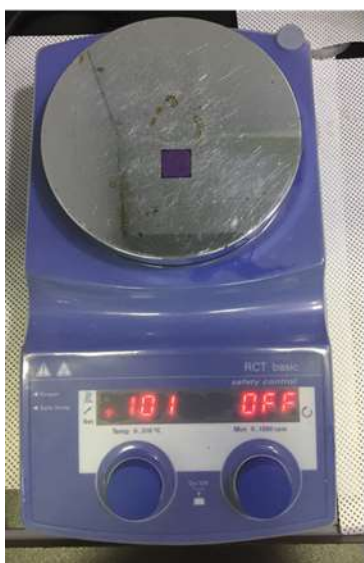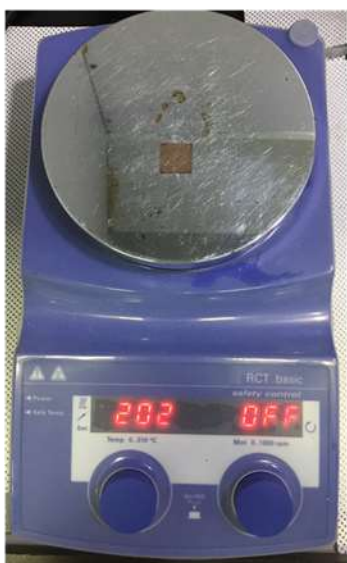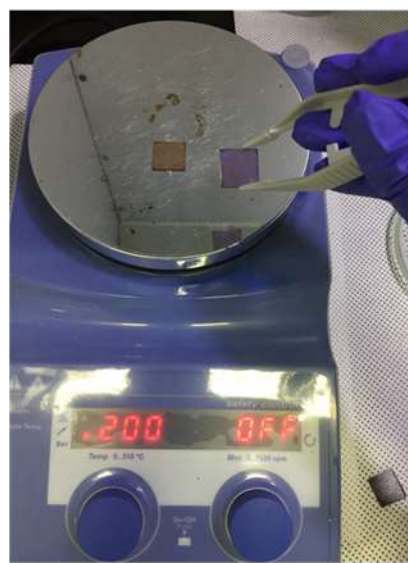

**Figure S4.** Film images as a function of annealing temperatures.

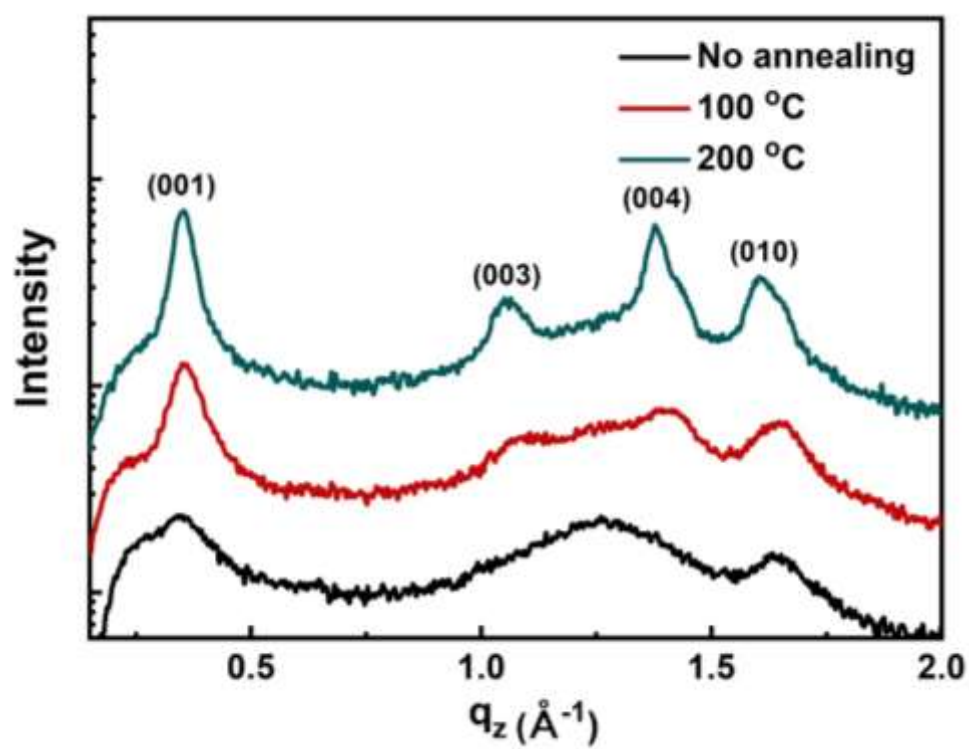

**Figure S5.** In-plane X-ray diffraction patterns of PC12TVC5F7T.

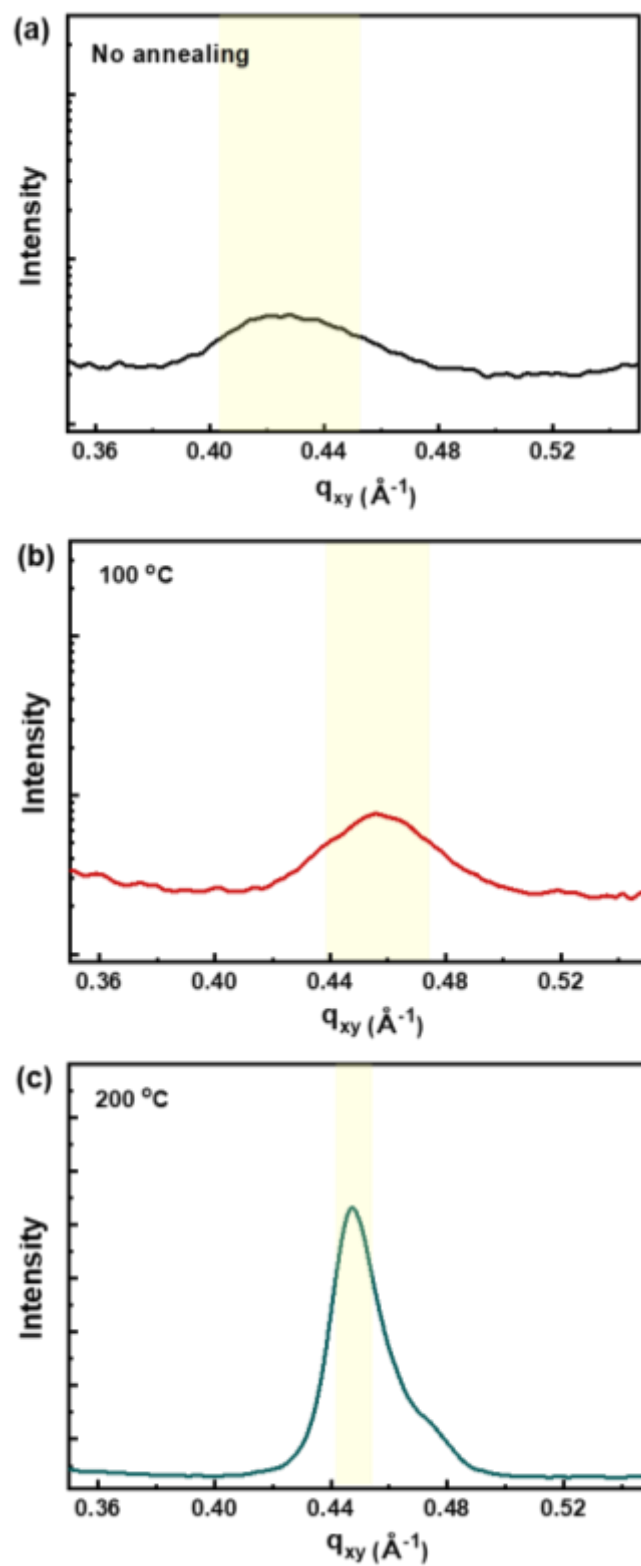

**Figure S6.** FWHM of (200) peaks in out-of-plane directions for (a) no annealing films, (b) 100 °C film, and (c) 200 °C film.

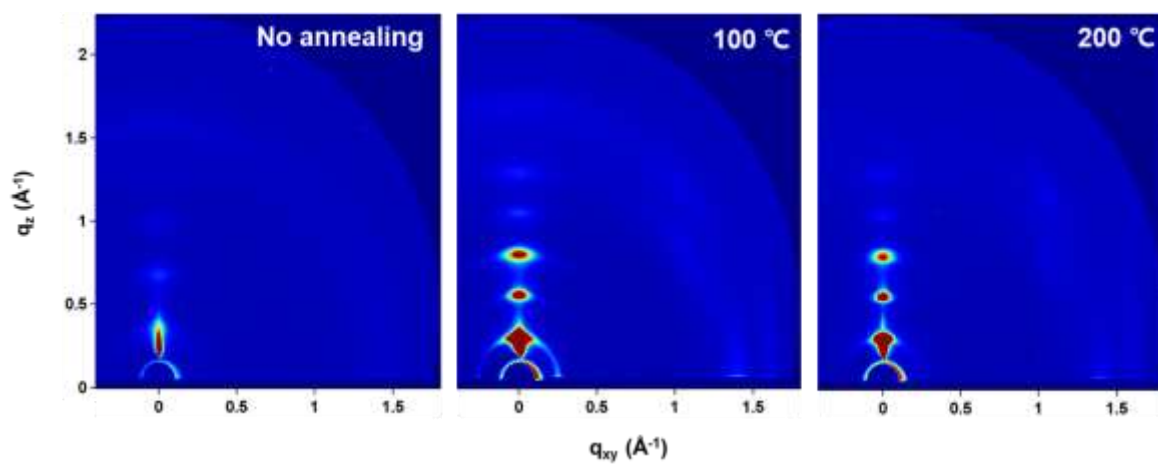

**Figure S7.** 2D GIWAXS images of PC12TVC12T annealed at different temperatures.



**Table S1** The crystallographic parameters of PC12TVC5FT

|              |                         | Out of plane |       |       |       |       | In plane |       |       |       |
|--------------|-------------------------|--------------|-------|-------|-------|-------|----------|-------|-------|-------|
|              |                         | (100)        | (200) | (300) | (400) | (500) | (001)    | (003) | (004) | (010) |
| No annealing | Q ( $\text{\AA}^{-1}$ ) | 0.214        | 0.419 | 0.634 | -     | -     | 0.345    | -     | -     | 1.637 |
| 100 °C       | Q ( $\text{\AA}^{-1}$ ) | 0.222        | 0.455 | 0.681 | 0.904 | 1.116 | 0.359    | 1.085 | 1.414 | 1.661 |
| 200 °C       | Q ( $\text{\AA}^{-1}$ ) | 0.226        | 0.447 | 0.669 | 0.890 | 1.116 | 0.353    | 1.050 | 1.376 | 1.603 |

HOMO

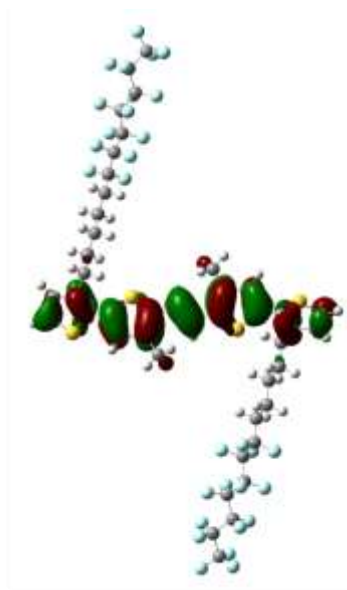

LUMO

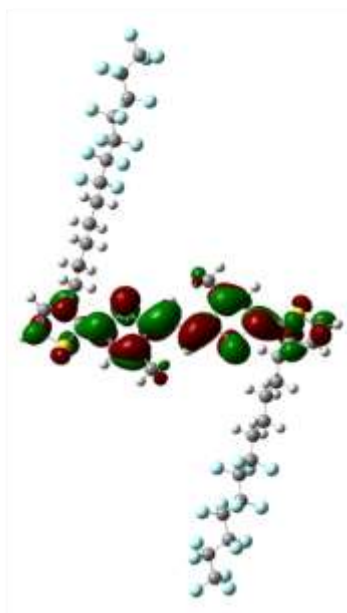

**Figure S8.** HOMO and LUMO electron density plots of optimized geometries for PC12TVC5F7T

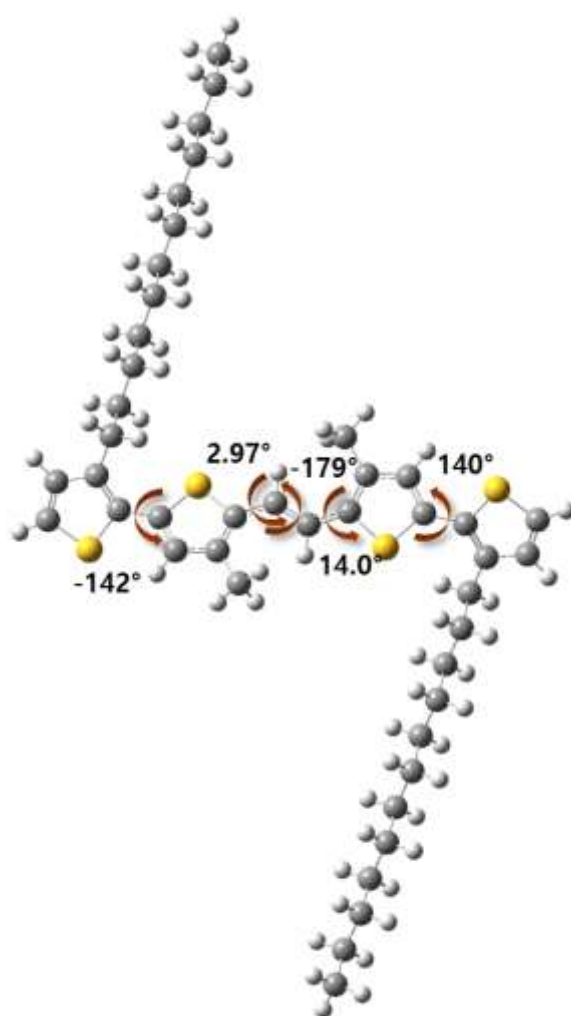

**Figure S9.** DFT Calculated dihedral angels of PC12TV12T without SFA side chains

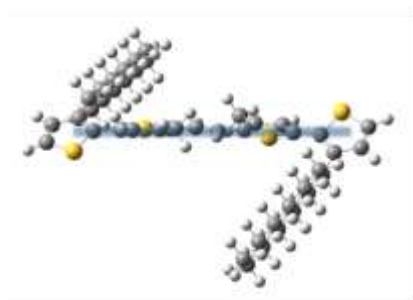

**PC12TVC12T**

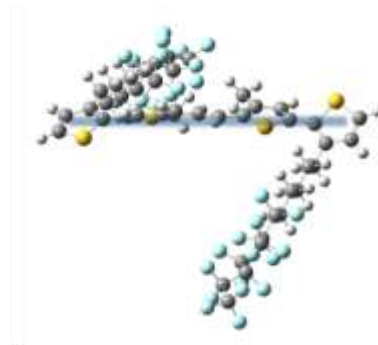

**PC12TVC5F7T**

**Figure S10.** Side view of DFT calculations of PC12TV12T and PC12TVC5F7T
